# Supplementary material for: Neocortical synaptic engrams for remote contextual memories
Source: PubMed Central journal article supplement (PMC9905017; doi:10.1038/s41593-022-01223-1), 2022-12-23
Supplement: 41593_2022_1223_MOESM1_ESM.pdf [file 41593_2022_1223_MOESM1_ESM.pdf]

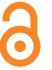

---

# Neocortical synaptic engrams for remote contextual memories

---

In the format provided by the authors and unedited

---

## SUPPLEMENTARY INFORMATION

**Supplementary Table 1 Summary of statistical analysis: t-test\***

| Data                    | t-test   | Response variable                  | Groups                                                      | DF** | t value | P value |
|-------------------------|----------|------------------------------------|-------------------------------------------------------------|------|---------|---------|
| <a href="#">Fig. 1c</a> | Unpaired | Freezing time                      | HC (10 mice)<br>CFC (11 mice)                               | 17   | -1.05   | 0.308   |
| <a href="#">Fig. 1e</a> | Unpaired | tdTomato+ cell density             | HC (8 mice)<br>CFC (7 mice)                                 | 6    | -3.04   | 0.023   |
| <a href="#">Fig. 1e</a> | Unpaired | c-Fos+ cell density                | HC (8 mice)<br>CFC (7 mice)                                 | 12   | -1.43   | 0.179   |
| <a href="#">Fig. 1e</a> | Unpaired | Fos+ proportion among tdT+ cells   | HC (8 mice)<br>CFC (7 mice)                                 | 12   | -6.13   | < 0.001 |
| <a href="#">Fig. 1g</a> | Unpaired | tdTomato+ cell density             | HC (6 mice)<br>CFC (7 mice)                                 | 8    | -2.51   | 0.036   |
| <a href="#">Fig. 1g</a> | Unpaired | c-Fos+ cell density                | HC (6 mice)<br>CFC (7 mice)                                 | 9    | -1.68   | 0.128   |
| <a href="#">Fig. 1g</a> | Unpaired | Fos+ proportion among tdT+ cells   | HC (6 mice)<br>CFC (7 mice)                                 | 9    | -5.35   | < 0.001 |
| <a href="#">Fig. 3f</a> | Unpaired | Freezing time                      | eYFP (13 mice)<br>MutCREB (15 mice)                         | 25   | 2.42    | 0.023   |
| <a href="#">Fig. 3j</a> | Unpaired | AMPA EPSC                          | E-E synapses (26 cells)<br>E-NE synapses (24 cells)         | 47   | -1.11   | 0.273   |
| <a href="#">Fig. 3j</a> | Unpaired | AMPA/NMDA ratio                    | E-E synapses (32 cells)<br>E-NE synapses (28 cells)         | 57   | -0.88   | 0.384   |
| <a href="#">Fig. 4i</a> | Paired   | qEPSC amplitude                    | tdT- vs tdT+ mPFC neurons<br>(16 pairs of neurons)          | 15   | 0.29    | 0.776   |
| <a href="#">Fig. 4j</a> | Unpaired | qEPSC (E-E) - qEPSC (E-NE)         | 7 days after CFC (16 pairs)<br>28 days after CFC (27 pairs) | 32   | -2.30   | 0.028   |
| <a href="#">Fig. 5c</a> | Unpaired | tdTomato+ cell density             | Casp3- (11 mice)<br>Casp3+ (10 mice)                        | 18   | 4.18    | < 0.001 |
| <a href="#">Fig. 5e</a> | Unpaired | Fos+ proportion among tdT+ cells   | Casp3- (8 mice)<br>Casp3+ (9 mice)                          | 13   | 3.32    | 0.006   |
| <a href="#">Fig. 5f</a> | Unpaired | Fos+ proportion among tdT+ cells   | Casp3- (8 mice)<br>Casp3+ (9 mice)                          | 13   | 5.09    | < 0.001 |
| <a href="#">Fig. 5h</a> | Unpaired | Freezing time                      | Casp3- (4 mice)<br>Casp3+ (5 mice)                          | 3    | 7.53    | 0.005   |
| <a href="#">Fig. 5j</a> | Paired   | qEPSC amplitude (DG: Casp3+ group) | tdT- (E-NE) vs tdT+ (E-E) neurons<br>(20 pairs of neurons)  | 19   | -0.04   | 0.972   |
| <a href="#">Fig. 5j</a> | Paired   | qEPSC amplitude (DG: Casp3- group) | tdT- (E-NE) vs tdT+ (E-E) neurons<br>(16 pairs of neurons)  | 15   | -2.92   | 0.011   |
| <a href="#">Fig. 6k</a> | Unpaired | Freezing time                      | dCA1: Casp3- (6 mice)<br>dCA1: Casp3+ (6 mice)              | 6    | 3.14    | 0.020   |
| <a href="#">Fig. 6k</a> | Unpaired | Freezing time                      | RSC: Casp3- (9 mice)<br>RSC: Casp3+ (10 mice)               | 16   | 3.41    | 0.004   |
| <a href="#">Fig. 7e</a> | Unpaired | AMPA/NMDA ratio                    | E-E synapses (20 cells)<br>E-NE synapses (19 cells)         | 31   | -3.64   | 0.001   |

| Data                     | t-test   | Response variable    | Groups                                                       | DF** | t value | P value |
|--------------------------|----------|----------------------|--------------------------------------------------------------|------|---------|---------|
| <b>Fig. 8g</b>           | Paired   | AMPA/NMDA ratio      | tdT- vs tdT+ mPFC neurons<br>(13 pairs of neurons)           | 12   | -5.00   | < 0.001 |
| <b>Ext. Data Fig. 1b</b> | Unpaired | Freezing time        | Same context (9 mice)<br>Different context (9 mice)          | 15   | 1.95    | 0.070   |
| <b>Ext. Data Fig. 2e</b> | Paired   | AMPA EPSC amplitude  | tdT- (NE-NE) vs tdT+ (NE-E) neurons<br>(13 pairs of neurons) | 12   | -2.24   | 0.043   |
| <b>Ext. Data Fig. 2e</b> | Paired   | AMPA/NMDA ratio      | tdT- (NE-NE) vs tdT+ (NE-E) neurons<br>(14 pairs of neurons) | 13   | -2.68   | 0.019   |
| <b>Ext. Data Fig. 2h</b> | Paired   | AMPA EPSC amplitude  | tdT- (NE-NE) vs tdT+ (NE-E) neurons<br>(14 pairs of neurons) | 13   | -1.09   | 0.295   |
| <b>Ext. Data Fig. 2h</b> | Paired   | AMPA/NMDA ratio      | tdT- (NE-NE) vs tdT+ (NE-E) neurons<br>(15 pairs of neurons) | 14   | -3.82   | 0.002   |
| <b>Ext. Data Fig. 2k</b> | Paired   | AMPA EPSC amplitude  | tdT- (NE-NE) vs tdT+ (NE-E) neurons<br>(12 pairs of neurons) | 11   | -0.15   | 0.886   |
| <b>Ext. Data Fig. 2k</b> | Paired   | AMPA/NMDA ratio      | tdT- (NE-NE) vs tdT+ (NE-E) neurons<br>(12 pairs of neurons) | 11   | 0.06    | 0.954   |
| <b>Ext. Data Fig. 3d</b> | Unpaired | Freezing time        | mCherry (9 mice)<br>hM4Di (9 mice)                           | 15   | 2.68    | 0.017   |
| <b>Ext. Data Fig. 3e</b> | Unpaired | Freezing time        | mCherry (13 mice)<br>hM4Di (10 mice)                         | 20   | -0.06   | 0.952   |
| <b>Ext. Data Fig. 4d</b> | Paired   | AMPA EPSC amplitude  | tdT- (NE-NE) vs tdT+ (NE-E) neurons<br>(11 pairs of neurons) | 10   | -1.11   | 0.293   |
| <b>Ext. Data Fig. 4d</b> | Paired   | AMPA/NMDA ratio      | tdT- (NE-NE) vs tdT+ (NE-E) neurons<br>(12 pairs of neurons) | 11   | -1.31   | 0.219   |
| <b>Ext. Data Fig. 4e</b> | Unpaired | AN (E-E) - AN (E-NE) | Engram inputs (30 pairs)<br>Nonengram inputs (12 pairs)      | 37   | 2.92    | 0.006   |
| <b>Ext. Data Fig. 5e</b> | Paired   | AMPA EPSC            | tdT- (E-NE) vs tdT+ (E-E) neurons<br>(16 pairs of neurons)   | 15   | -3.52   | 0.003   |
| <b>Ext. Data Fig. 5e</b> | Paired   | AMPA/NMDA ratio      | tdT- (E-NE) vs tdT+ (E-E) neurons<br>(13 pairs of neurons)   | 12   | -4.31   | 0.001   |
| <b>Ext. Data Fig. 5j</b> | Paired   | AMPA EPSC            | tdT- (E-NE) vs tdT+ (E-E) neurons<br>(13 pairs of neurons)   | 12   | -1.52   | 0.155   |
| <b>Ext. Data Fig. 5j</b> | Paired   | AMPA/NMDA ratio      | tdT- (E-NE) vs tdT+ (E-E) neurons<br>(13 pairs of neurons)   | 12   | 0.00    | 0.996   |
| <b>Ext. Data Fig. 6d</b> | Paired   | qEPSC amplitude      | tdT- (E-NE) vs tdT+ (E-E) neurons<br>(20 pairs of neurons)   | 19   | -3.37   | 0.003   |
| <b>Ext. Data Fig. 6f</b> | Paired   | mEPSC amplitude      | tdT- vs tdT+ neurons<br>(11 pairs of neurons)                | 10   | -0.42   | 0.681   |
| <b>Ext. Data Fig. 6i</b> | Paired   | qEPSC amplitude      | tdT- (E-NE) vs tdT+ (E-E) neurons<br>(14 pairs of neurons)   | 13   | -0.17   | 0.870   |
| <b>Ext. Data Fig. 7d</b> | Paired   | qIPSC amplitude      | tdT- vs tdT+ mPFC neurons<br>(24 pairs of neurons)           | 23   | 3.35    | 0.003   |
| <b>Ext. Data Fig. 8c</b> | Paired   | AMPA/NMDA ratio      | tdT- (NE-NE) vs tdT+ (NE-E) neurons<br>(13 pairs of neurons) | 12   | -0.20   | 0.848   |
| <b>Ext. Data Fig. 8g</b> | Paired   | qEPSC amplitude      | tdT- (E-NE) vs tdT+ (E-E) neurons<br>(20 pairs of neurons)   | 19   | -0.57   | 0.574   |

| Data                              | t-test   | Response variable      | Groups                                            | DF** | t value | P value |
|-----------------------------------|----------|------------------------|---------------------------------------------------|------|---------|---------|
| <a href="#">Ext. Data Fig. 8h</a> | Unpaired | tdTomato+ cell density | Casp3- (5 mice)<br>Casp3+ (6 mice)                | 4    | 5.01    | 0.007   |
| <a href="#">Ext. Data Fig. 8i</a> | Unpaired | tdTomato+ cell density | Casp3- (7 mice)<br>Casp3+ (9 mice)                | 7    | 7.78    | < 0.001 |
| <a href="#">Ext. Data Fig. 9f</a> | Unpaired | Freezing time          | eYFP (11 mice)<br>PSAM4 (9 mice)                  | 17   | 2.13    | 0.048   |
| <a href="#">Ext. Data Fig. 9g</a> | Unpaired | Freezing time          | eYFP (6 mice)<br>PSAM4 (8 mice)                   | 11   | -0.20   | 0.845   |
| <a href="#">Ext. Data Fig. 9j</a> | Paired   | AMPA/NMDA ratio        | tdT- vs tdT+ BLA neurons<br>(12 pairs of neurons) | 11   | -3.99   | 0.002   |
| <a href="#">Ext. Data Fig. 9k</a> | Paired   | AMPA/NMDA ratio        | tdT- vs tdT+ BLA neurons<br>(16 pairs of neurons) | 15   | -0.73   | 0.478   |

\* All t-tests were two-sided.

\*\* DF: degree of freedom

## Supplementary Table 2 Summary of statistical analysis: ANOVA

| Data                                                     | ANOVA                     | Response variable | Factors                                                | DF*     | F value        | P value         |        |      |       |
|----------------------------------------------------------|---------------------------|-------------------|--------------------------------------------------------|---------|----------------|-----------------|--------|------|-------|
| Fig. 1f                                                  | Repeated measures two-way | Freezing time (%) | Groups                                                 | (1,20)  | 2.74           | 0.114           |        |      |       |
|                                                          |                           |                   | ChR2 (13 mice)                                         |         |                |                 |        |      |       |
|                                                          |                           |                   | eYFP (9 mice)                                          |         |                |                 |        |      |       |
|                                                          |                           |                   | Behavioral session                                     | (1,20)  | 4.91           | 0.038           |        |      |       |
|                                                          |                           |                   | Laser on                                               |         |                |                 |        |      |       |
|                                                          |                           |                   | Laser off                                              |         |                |                 |        |      |       |
|                                                          |                           |                   | Subject                                                | (20,20) | 7.18           | < 0.001         |        |      |       |
|                                                          |                           |                   | Interaction (group x behavioral session)               | (1,20)  | 9.14           | 0.007           |        |      |       |
|                                                          |                           |                   | ** Post hoc comparisons                                |         |                |                 |        |      |       |
|                                                          |                           |                   | ChR2: laser on versus laser off: P = 0.003             |         |                |                 |        |      |       |
| eYFP: laser on versus laser off: P = 1.000               |                           |                   |                                                        |         |                |                 |        |      |       |
| ChR2 / laser on versus eYFP / laser on: P = 0.021        |                           |                   |                                                        |         |                |                 |        |      |       |
| Fig. 2e, 2h                                              | Two-way                   | AMPA EPSC         | Test day                                               | (1,92)  | 17.17          | < 0.001         |        |      |       |
|                                                          |                           |                   | 28 days after CFC (Fig. 2e)                            |         |                |                 |        |      |       |
|                                                          |                           |                   | 7 days after CFC (Fig. 2h)                             |         |                |                 |        |      |       |
|                                                          |                           |                   | Synapses                                               | (1,92)  | 8.44           | 0.005           |        |      |       |
|                                                          |                           |                   | E-E synapses                                           |         |                |                 |        |      |       |
|                                                          |                           |                   | E-NE synapses                                          |         |                |                 |        |      |       |
|                                                          |                           |                   | Interaction (test day x synapses)                      | (1,92)  | 4.09           | 0.046           |        |      |       |
|                                                          |                           |                   | ** Post hoc comparisons                                |         |                |                 |        |      |       |
|                                                          |                           |                   | 28 days after CFC: E-E versus E-NE synapses: P < 0.001 |         |                |                 |        |      |       |
|                                                          |                           |                   | 7 days after CFC: E-E versus E-NE synapses: P = 1.000  |         |                |                 |        |      |       |
| E-E synapses: 28 days versus 7 days after CFC: P < 0.001 |                           |                   |                                                        |         |                |                 |        |      |       |
| Fig. 2e, 2h                                              | Two-way                   | AMPA/NMDA ratio   | Test day                                               | (1,93)  | 0.97           | 0.327           |        |      |       |
|                                                          |                           |                   | 28 days after CFC (Fig. 2e)                            |         |                |                 |        |      |       |
|                                                          |                           |                   | 7 days after CFC (Fig. 2h)                             |         |                |                 |        |      |       |
|                                                          |                           |                   | Synapses                                               | (1,93)  | 10.08          | 0.002           |        |      |       |
|                                                          |                           |                   | E-E synapses                                           |         |                |                 |        |      |       |
|                                                          |                           |                   | E-NE synapses                                          |         |                |                 |        |      |       |
|                                                          |                           |                   | Interaction (test day x synapses)                      | (1,93)  | 8.10           | 0.005           |        |      |       |
|                                                          |                           |                   | ** Post hoc comparisons                                |         |                |                 |        |      |       |
|                                                          |                           |                   | 28 days after CFC: E-E versus E-NE synapses: P < 0.001 |         |                |                 |        |      |       |
|                                                          |                           |                   | 7 days after CFC: E-E versus E-NE synapses: P = 1.000  |         |                |                 |        |      |       |
| E-E synapses: 28 days versus 7 days after CFC: P = 0.049 |                           |                   |                                                        |         |                |                 |        |      |       |
| Fig. 3d                                                  | One-way                   | AMPA/NMDA ratio   | Synapses                                               | (2,46)  | 10.41          | < 0.001         |        |      |       |
|                                                          |                           |                   | E-NE synapses (18 cells)                               |         |                |                 |        |      |       |
|                                                          |                           |                   | E-E/MutCREB- synapses (13 cells)                       |         |                |                 |        |      |       |
|                                                          |                           |                   | E-E/MutCREB+ synapses (18 cells)                       |         |                |                 |        |      |       |
|                                                          |                           |                   | ** Post hoc comparisons                                |         |                |                 |        |      |       |
|                                                          |                           |                   | E-NE versus E-E/MutCREB- synapses: P < 0.001           |         |                |                 |        |      |       |
|                                                          |                           |                   | E-E/MutCREB- versus E-E/MutCREB+ synapses: P = 0.001   |         |                |                 |        |      |       |
|                                                          |                           |                   | E-NE versus E-E/MutCREB+ synapses: P = 1.000           |         |                |                 |        |      |       |
|                                                          |                           |                   | Fig. 4e, 4g                                            | Two-way | EPSC amplitude | EPSC            | (1,47) | 2.14 | 0.148 |
|                                                          |                           |                   |                                                        |         |                | qEPSC (Fig. 4e) |        |      |       |
| mEPSC (Fig. 4g)                                          |                           |                   |                                                        |         |                |                 |        |      |       |
| Postsynaptic neurons                                     | (1,47)                    | 4.88              |                                                        |         |                | 0.032           |        |      |       |
| tdT- neurons                                             |                           |                   |                                                        |         |                |                 |        |      |       |
| tdT+ neurons                                             |                           |                   |                                                        |         |                |                 |        |      |       |
| Cell pairs                                               | (47,47)                   | 3.80              |                                                        |         |                | < 0.001         |        |      |       |
| qEPSC (27 pairs of tdT- / tdT+ neurons)                  |                           |                   |                                                        |         |                |                 |        |      |       |
| mEPSC (22 pairs of tdT- / tdT+ neurons)                  |                           |                   |                                                        |         |                |                 |        |      |       |
| Interaction (EPSC x postsynaptic neurons)                | (1,47)                    | 4.39              |                                                        |         |                | 0.042           |        |      |       |
| ** Post hoc comparisons                                  |                           |                   |                                                        |         |                |                 |        |      |       |
| qEPSC: tdT- (E-NE) versus tdT+ (E-E): P = 0.014          |                           |                   |                                                        |         |                |                 |        |      |       |
| mEPSC: tdT- versus tdT+: P = 1.000                       |                           |                   |                                                        |         |                |                 |        |      |       |

\* DF: degree of freedom

\*\* Post hoc Bonferroni's simultaneous multiple comparisons

| Data                                                  | ANOVA                     | Response variable | Factors                                               | DF*                       | F value           | P value |
|-------------------------------------------------------|---------------------------|-------------------|-------------------------------------------------------|---------------------------|-------------------|---------|
| Fig. 5d                                               | Repeated measures two-way | Freezing time (%) | Groups                                                | (1,24)                    | 28.99             | < 0.001 |
|                                                       |                           |                   | Casp3- (9 mice)                                       |                           |                   |         |
|                                                       |                           |                   | Casp3+ (17 mice)                                      |                           |                   |         |
|                                                       |                           |                   | Recall session                                        | (1,24)                    | 4.88              | 0.037   |
|                                                       |                           |                   | Recent memory                                         |                           |                   |         |
|                                                       |                           |                   | Remote memory                                         |                           |                   |         |
|                                                       |                           |                   | Subject                                               | (24,24)                   | 1.55              | 0.145   |
|                                                       |                           |                   | Interaction (group x recall session)                  | (1,24)                    | 25.73             | < 0.001 |
|                                                       |                           |                   | ** Post hoc comparisons                               |                           |                   |         |
|                                                       |                           |                   | Recent memory recall: Casp3- versus Casp3+: P = 1.000 |                           |                   |         |
| Remote memory recall: Casp3- versus Casp3+: P < 0.001 |                           |                   |                                                       |                           |                   |         |
| Fig. 7e                                               | Repeated measures two-way | AMPA EPSC         | BLA neurons                                           | (1,24)                    | 15.30             | < 0.001 |
|                                                       |                           |                   | tdT- neurons                                          |                           |                   |         |
|                                                       |                           |                   | tdT+ neurons                                          |                           |                   |         |
|                                                       |                           |                   | Photostimulation intensity                            | (2,24)                    | 10.56             | 0.003   |
|                                                       |                           |                   | 6.3, 13.4, and 20.5 mW/mm <sup>2</sup>                |                           |                   |         |
|                                                       |                           |                   | Cell                                                  | (27,24)                   | 7.11              | < 0.001 |
| Fig. 7i                                               | Repeated measures two-way | AMPA EPSC         | Interaction (BLA neurons x photostim)                 | (2,24)                    | 0.41              | 0.669   |
|                                                       |                           |                   | mPFC neurons                                          | (1,60)                    | 0.00              | 0.997   |
|                                                       |                           |                   | mCherry- neurons                                      |                           |                   |         |
|                                                       |                           |                   | mCherry+ neurons                                      |                           |                   |         |
|                                                       |                           |                   | Photostimulation intensity                            | (3,60)                    | 32.33             | < 0.001 |
|                                                       |                           |                   | 2.8, 6.3, 13.4, and 20.5 mW/mm <sup>2</sup>           |                           |                   |         |
| Fig. 8g                                               | Repeated measures two-way | AMPA EPSC         | Cell                                                  | (20,60)                   | 8.19              | < 0.001 |
|                                                       |                           |                   | Interaction (mPFC neurons x photostim)                | (3,60)                    | 0.09              | 0.964   |
|                                                       |                           |                   | mPFC neurons                                          | (1,56)                    | 158.02            | < 0.001 |
|                                                       |                           |                   | tdT- neurons                                          |                           |                   |         |
|                                                       |                           |                   | tdT+ neurons                                          |                           |                   |         |
|                                                       |                           |                   | Photostimulation intensity                            | (2,56)                    | 45.60             | < 0.001 |
| Ext. Data Fig. 3c                                     | Repeated measures two-way | AP firing number  | 6.3, 13.4, and 20.5 mW/mm <sup>2</sup>                |                           |                   |         |
|                                                       |                           |                   | Cell                                                  | (28,56)                   | 30.35             | < 0.001 |
|                                                       |                           |                   | Interaction (mPFC neurons x photostim)                | (2,56)                    | 3.23              | 0.047   |
|                                                       |                           |                   | ** Post hoc comparisons                               |                           |                   |         |
|                                                       |                           |                   | 6.3 mW/mm <sup>2</sup> : tdT- versus tdT+: P < 0.001  |                           |                   |         |
|                                                       |                           |                   | 13.4 mW/mm <sup>2</sup> : tdT- versus tdT+: P < 0.001 |                           |                   |         |
|                                                       |                           |                   | 20.5 mW/mm <sup>2</sup> : tdT- versus tdT+: P < 0.001 |                           |                   |         |
|                                                       |                           |                   | CNO treatment                                         | (1,54)                    | 26.17             | < 0.001 |
|                                                       |                           |                   | Pre-CNO                                               |                           |                   |         |
|                                                       |                           |                   | Post-CNO                                              |                           |                   |         |
| Ext. Data Fig. 10d                                    | Repeated measures two-way | Freezing time (%) | Current injection                                     | (3,54)                    | 17.84             | < 0.001 |
|                                                       |                           |                   | 100, 200, 300, and 400 pA                             |                           |                   |         |
|                                                       |                           |                   | Cell (9 cells)                                        | (8,54)                    | 4.89              | < 0.001 |
|                                                       |                           |                   | Interaction (CNO x current injection)                 | (3,54)                    | 2.2               | 0.098   |
|                                                       |                           |                   | Groups                                                | (1,13)                    | 24.63             | < 0.001 |
|                                                       |                           |                   | mCherry (8 mice)                                      |                           |                   |         |
| Ext. Data Fig. 10f                                    | Repeated measures two-way | Freezing time (%) | hM4Di (7 mice)                                        |                           |                   |         |
|                                                       |                           |                   | Recall session                                        | (1,13)                    | 59.50             | < 0.001 |
|                                                       |                           |                   | Recall 1 (+Tam)                                       |                           |                   |         |
|                                                       |                           |                   | Recall 2 (+CNO)                                       |                           |                   |         |
|                                                       |                           |                   | Subject                                               | (13,13)                   | 5.71              | 0.002   |
|                                                       |                           |                   | Interaction (group x recall session)                  | (1,13)                    | 9.51              | 0.009   |
|                                                       |                           |                   | ** Post hoc comparisons                               |                           |                   |         |
|                                                       |                           |                   | Recall 1 (+Tam): mCherry versus hM4Di: P = 1.000      |                           |                   |         |
|                                                       |                           |                   | Recall 2 (+CNO): mCherry versus hM4Di: P < 0.001      |                           |                   |         |
|                                                       |                           |                   | Ext. Data Fig. 10f                                    | Repeated measures two-way | Freezing time (%) | Groups  |
| mCherry (9 mice)                                      |                           |                   |                                                       |                           |                   |         |
| hM4Di (10 mice)                                       |                           |                   |                                                       |                           |                   |         |
| Recall session                                        | (1,17)                    | 4.63              |                                                       |                           |                   | 0.046   |
| Recall 1 (+Tam)                                       |                           |                   |                                                       |                           |                   |         |
| Recall 2 (+CNO)                                       |                           |                   |                                                       |                           |                   |         |
| Ext. Data Fig. 10f                                    | Repeated measures two-way | Freezing time (%) | Subject                                               | (17,17)                   | 2.19              | 0.058   |
|                                                       |                           |                   | Interaction (group x recall session)                  | (1,17)                    | 0.01              | 0.934   |
