# Supplementary material for: Neocortical synaptic engrams for remote contextual memories
Source: PubMed Central journal article supplement (PMC9905017; doi:10.1038/s41593-022-01223-1), 2022-12-23
Supplement: 41593_2022_1223_MOESM2_ESM.pdf [file 41593_2022_1223_MOESM2_ESM.pdf]

## Reporting Summary

Nature Portfolio wishes to improve the reproducibility of the work that we publish. This form provides structure for consistency and transparency in reporting. For further information on Nature Portfolio policies, see our [Editorial Policies](#) and the [Editorial Policy Checklist](#).

### Statistics

For all statistical analyses, confirm that the following items are present in the figure legend, table legend, main text, or Methods section.

n/a Confirmed

- The exact sample size ( $n$ ) for each experimental group/condition, given as a discrete number and unit of measurement
- A statement on whether measurements were taken from distinct samples or whether the same sample was measured repeatedly
- The statistical test(s) used AND whether they are one- or two-sided  
*Only common tests should be described solely by name; describe more complex techniques in the Methods section.*
- A description of all covariates tested
- A description of any assumptions or corrections, such as tests of normality and adjustment for multiple comparisons
- A full description of the statistical parameters including central tendency (e.g. means) or other basic estimates (e.g. regression coefficient) AND variation (e.g. standard deviation) or associated estimates of uncertainty (e.g. confidence intervals)
- For null hypothesis testing, the test statistic (e.g.  $F$ ,  $t$ ,  $r$ ) with confidence intervals, effect sizes, degrees of freedom and  $P$  value noted  
*Give  $P$  values as exact values whenever suitable.*
- For Bayesian analysis, information on the choice of priors and Markov chain Monte Carlo settings
- For hierarchical and complex designs, identification of the appropriate level for tests and full reporting of outcomes
- Estimates of effect sizes (e.g. Cohen's  $d$ , Pearson's  $r$ ), indicating how they were calculated

*Our web collection on [statistics for biologists](#) contains articles on many of the points above.*

### Software and code

Policy information about [availability of computer code](#)

**Data collection** Clampex 10 (Molecular Devices) was used to obtain electrophysiological data. Ethovision XT 11 (Noldus) was used to collect data in behavioral studies.

**Data analysis** Clampfit 11 (Molecular Devices) was used to analyze electrophysiological data. ImageJ 1.52a (NIH) was used to analyze confocal microscopic data. Imaris 9 (Bitplane) was used to count labeled cells. Statistical analysis was performed with Minitab 21 software (Minitab).

For manuscripts utilizing custom algorithms or software that are central to the research but not yet described in published literature, software must be made available to editors and reviewers. We strongly encourage code deposition in a community repository (e.g. GitHub). See the Nature Portfolio [guidelines for submitting code & software](#) for further information.

### Data

Policy information about [availability of data](#)

All manuscripts must include a [data availability statement](#). This statement should provide the following information, where applicable:

- Accession codes, unique identifiers, or web links for publicly available datasets
- A description of any restrictions on data availability
- For clinical datasets or third party data, please ensure that the statement adheres to our [policy](#)

The source data underlying all Figures and Extended Data Figures are provided as Source Data files. All data reported in this study are available from the corresponding authors upon request.

## Field-specific reporting

Please select the one below that is the best fit for your research. If you are not sure, read the appropriate sections before making your selection.

Life sciences       Behavioural & social sciences       Ecological, evolutionary & environmental sciences

For a reference copy of the document with all sections, see [nature.com/documents/nr-reporting-summary-flat.pdf](https://www.nature.com/documents/nr-reporting-summary-flat.pdf)

## Life sciences study design

All studies must disclose on these points even when the disclosure is negative.

|                 |                                                                                                                                                                                                                                                                                                                                                                                                                                                                                                                                                                                                                                                                                                                                                                                                    |
|-----------------|----------------------------------------------------------------------------------------------------------------------------------------------------------------------------------------------------------------------------------------------------------------------------------------------------------------------------------------------------------------------------------------------------------------------------------------------------------------------------------------------------------------------------------------------------------------------------------------------------------------------------------------------------------------------------------------------------------------------------------------------------------------------------------------------------|
| Sample size     | Using preliminary data and results from previous studies, we performed power analysis to determine sample size. Sample sizes are indicated in figure legends .                                                                                                                                                                                                                                                                                                                                                                                                                                                                                                                                                                                                                                     |
| Data exclusions | No data was excluded from the study.                                                                                                                                                                                                                                                                                                                                                                                                                                                                                                                                                                                                                                                                                                                                                               |
| Replication     | Electrophysiological recording traces presented in figures are representative ones from independent experiments repeated n times (indicated in figure legends as the number of recorded postsynaptic neurons).<br><br>Micrographic images presented in figures are representative ones from experiments repeated independently: Fig. 1d (7 times), 1f (6 times), 1j (13 times), 2b (22 times), 3b (10 times), 3f (15 times), 4c (14 times), 5c (11 times), 5e (9 times), 5f (9 times), 6c-e (5 times), 6g (5 times), 7c (8 times), 7h (6 times), and 8d (7 times); Extended Data Fig. 1c (3 times), 1d (6 times), 1f (5 times), 1h (5 times), 1i (5 times), 2b (12 times), 3b (19 times), 5c (4 times), 5h (4 times), 8h (5 times), 8i (7 times), 9b (5 times), 9d (10 times), and 10b (12 times). |
| Randomization   | Mice were randomly assigned to behavioral groups.                                                                                                                                                                                                                                                                                                                                                                                                                                                                                                                                                                                                                                                                                                                                                  |
| Blinding        | Blinding was not possible for most electrophysiological experiments, in which experimenters had to identify labeled neurons (tdT+) versus adjacent nonlabeled neurons (tdT-) for visually-guided patch-clamp recording. Blinding was not relevant to behavioral studies as freezing behavior was automatically scored with constant settings in Ethovision. Investigators were blinded to groups for cell counting experiments.                                                                                                                                                                                                                                                                                                                                                                    |

## Reporting for specific materials, systems and methods

We require information from authors about some types of materials, experimental systems and methods used in many studies. Here, indicate whether each material, system or method listed is relevant to your study. If you are not sure if a list item applies to your research, read the appropriate section before selecting a response.

### Materials & experimental systems

### Methods

| n/a                                 | Involved in the study                                           | n/a                                 | Involved in the study                           |
|-------------------------------------|-----------------------------------------------------------------|-------------------------------------|-------------------------------------------------|
| <input type="checkbox"/>            | <input checked="" type="checkbox"/> Antibodies                  | <input checked="" type="checkbox"/> | <input type="checkbox"/> ChIP-seq               |
| <input checked="" type="checkbox"/> | <input type="checkbox"/> Eukaryotic cell lines                  | <input checked="" type="checkbox"/> | <input type="checkbox"/> Flow cytometry         |
| <input checked="" type="checkbox"/> | <input type="checkbox"/> Palaeontology and archaeology          | <input checked="" type="checkbox"/> | <input type="checkbox"/> MRI-based neuroimaging |
| <input type="checkbox"/>            | <input checked="" type="checkbox"/> Animals and other organisms |                                     |                                                 |
| <input checked="" type="checkbox"/> | <input type="checkbox"/> Human research participants            |                                     |                                                 |
| <input checked="" type="checkbox"/> | <input type="checkbox"/> Clinical data                          |                                     |                                                 |
| <input checked="" type="checkbox"/> | <input type="checkbox"/> Dual use research of concern           |                                     |                                                 |

## Antibodies

|                 |                                                                                                                                                                                                                                                                                                                                                                                                                                                                             |
|-----------------|-----------------------------------------------------------------------------------------------------------------------------------------------------------------------------------------------------------------------------------------------------------------------------------------------------------------------------------------------------------------------------------------------------------------------------------------------------------------------------|
| Antibodies used | Polyclonal rabbit affinity purified anti-c-Fos antibody (Synaptic Systems, Cat# 226003)<br>Goat anti-rabbit IgG antibody-Alexa Fluor 647 (Thermo Fisher, Cat# A-21246)                                                                                                                                                                                                                                                                                                      |
| Validation      | The antibodies were validated by the manufacturers as below:<br>anti-c-Fos antibody ( <a href="https://sysy.com/product/226003">https://sysy.com/product/226003</a> )<br>anti-rabbit IgG antibody ( <a href="https://www.thermofisher.com/antibody/product/Goat-anti-Rabbit-IgG-H-L-Cross-Adsorbed-Secondary-Antibody-Polyclonal/A-21246">https://www.thermofisher.com/antibody/product/Goat-anti-Rabbit-IgG-H-L-Cross-Adsorbed-Secondary-Antibody-Polyclonal/A-21246</a> ) |

## Animals and other organisms

Policy information about [studies involving animals](#); [ARRIVE guidelines](#) recommended for reporting animal research

|                    |                                                                                                                                                                                           |
|--------------------|-------------------------------------------------------------------------------------------------------------------------------------------------------------------------------------------|
| Laboratory animals | C57BL6/J mice (Jackson Laboratory Stock # 000664)<br>Fos-iCreERT2 (+/+) mice (Jackson Laboratory Stock # 030323)<br>Ai14 ROSA-LSL-tdTomato (+/+) mice (Jackson Laboratory Stock # 007914) |
|--------------------|-------------------------------------------------------------------------------------------------------------------------------------------------------------------------------------------|

\* These mice were singly housed in home cages on a 12-h light/dark cycle with food and water continuously available. The light cycle was from 8 AM to 8 PM. Temperature range was 23-25°C, and humidity range was 30-70 %. Eight-to twelve-week-old mice of both sexes underwent stereotaxic brain surgery.

Wild animals

No wild animal was used.

Field-collected samples

No field-collected sample was used.

Ethics oversight

All of the animal procedures were approved by the Institutional Animal Care and Use Committee of the University of California, Riverside.

Note that full information on the approval of the study protocol must also be provided in the manuscript.
